# Supplementary material
Source: PubMed Central journal article supplement (PMC5918152)
Supplement: NIHMS955169-supplement-supplement_1.pdf [file NIHMS955169-supplement-supplement_1.pdf]

### Variations in diet cause alterations in microbiota and metabolites that follow changes in disease severity in a multiple sclerosis model

J.E. Libbey, J.M. Sanchez, D.J. Doty, J.T. Sim, M.F. Cusick, J.E. Cox, K.F. Fischer, J.L. Round and R.S. Fujinami

**Figure S1. Flow chart detailing the treatment groups. Above the dotted line shows the animals on the different diets. Below the dotted line shows the *Lactobacillus paracasei* pre-treatment/treatment experiment.**

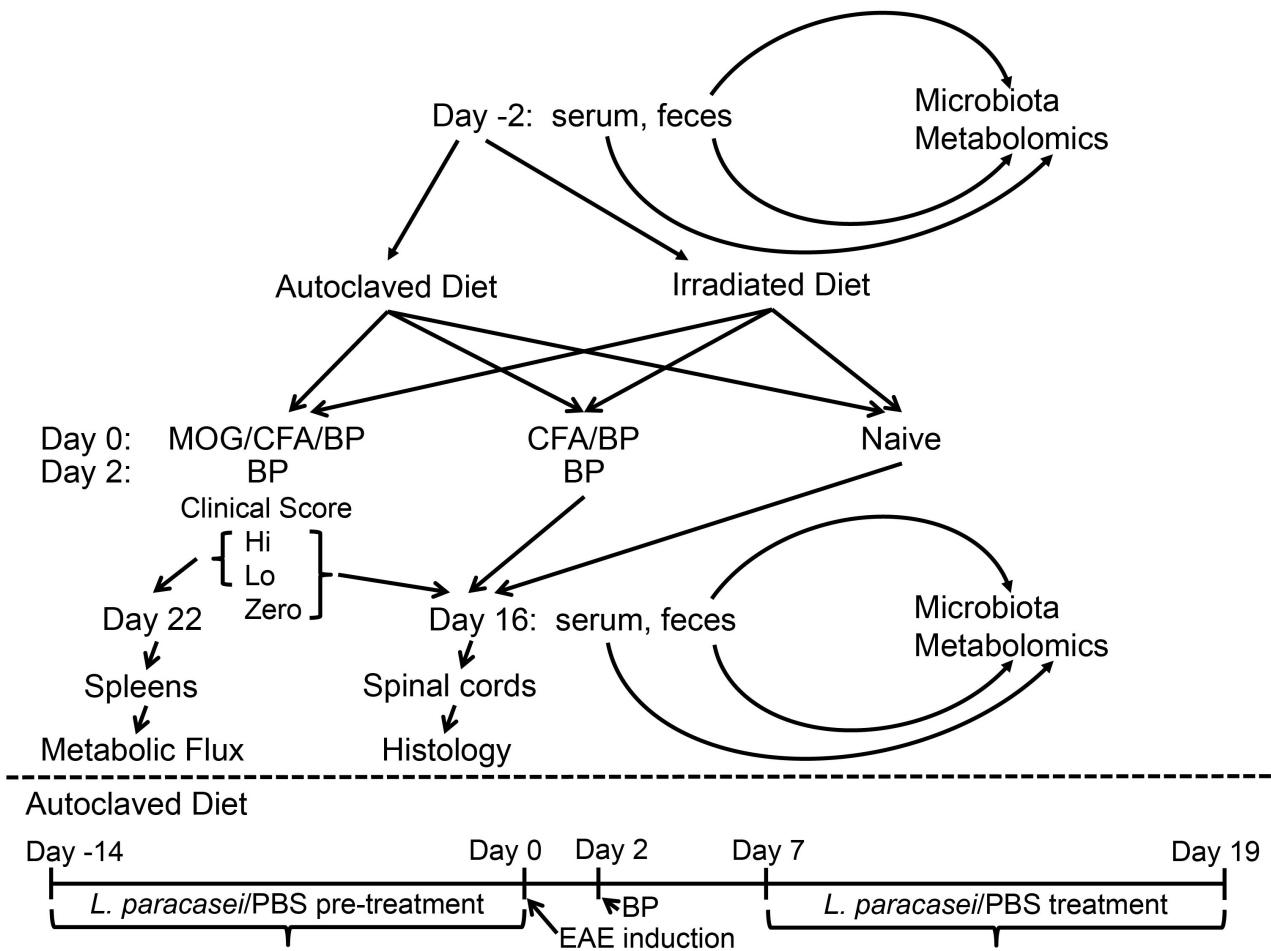

**Figure S2. Correlation analyses of select metabolites. Metabolites were chosen from Figures 3 & 4 that showed the same significance for the same comparison for both serum and feces. (A) Cross-time point comparisons. Two-tailed *t* test. (B) Comparisons examining the effects of diet on disease. Spearman's rank correlation.**

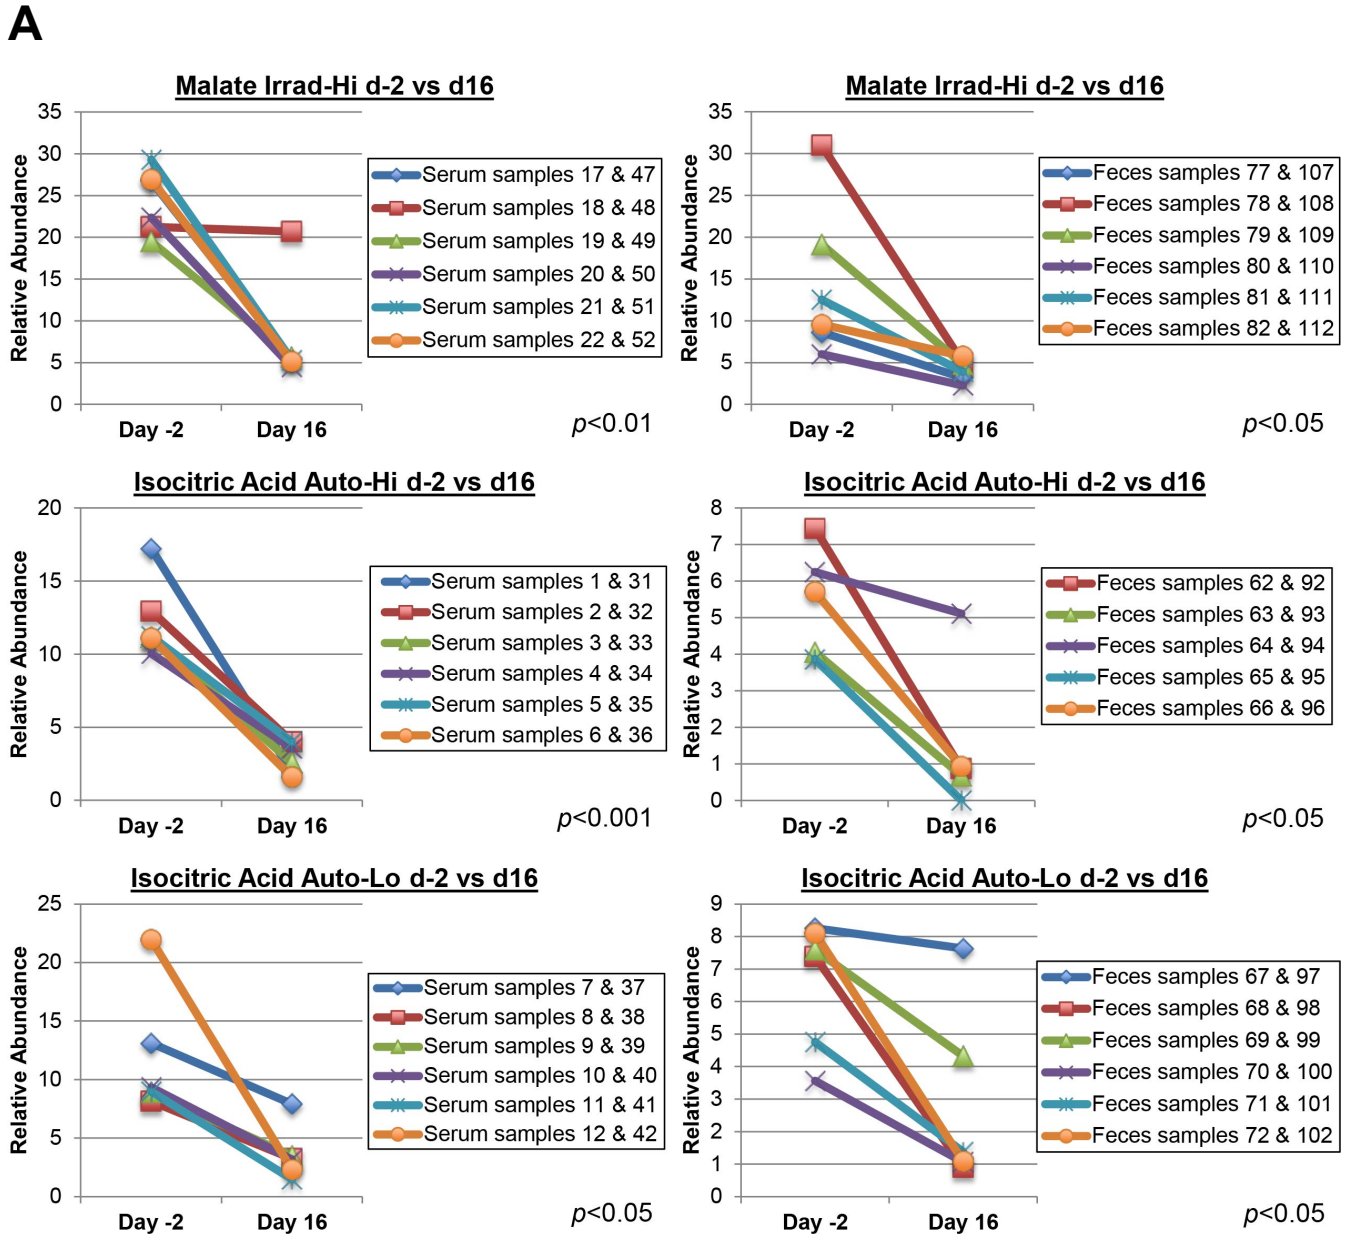

**B**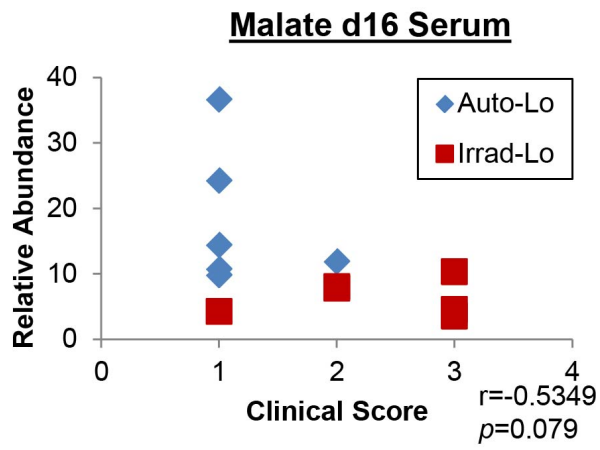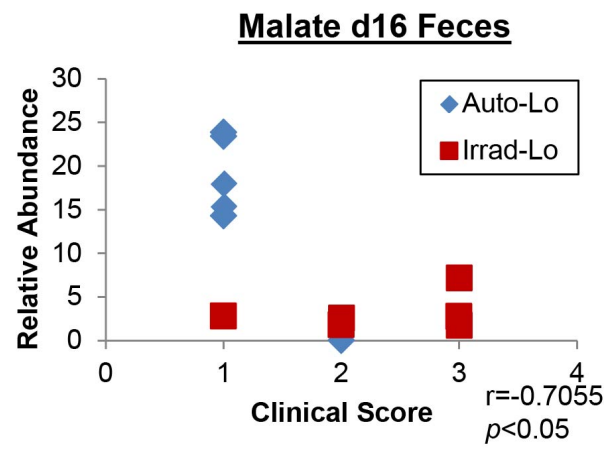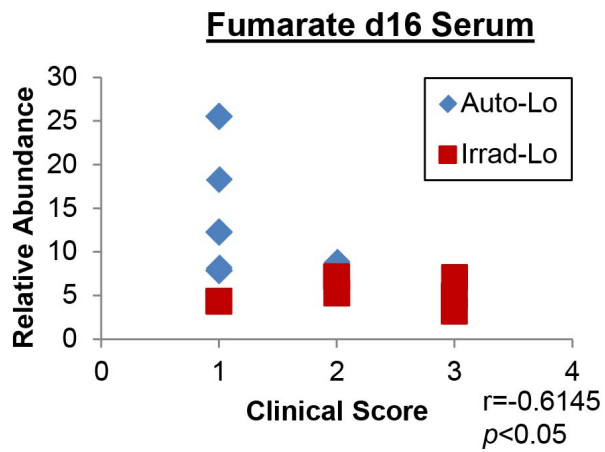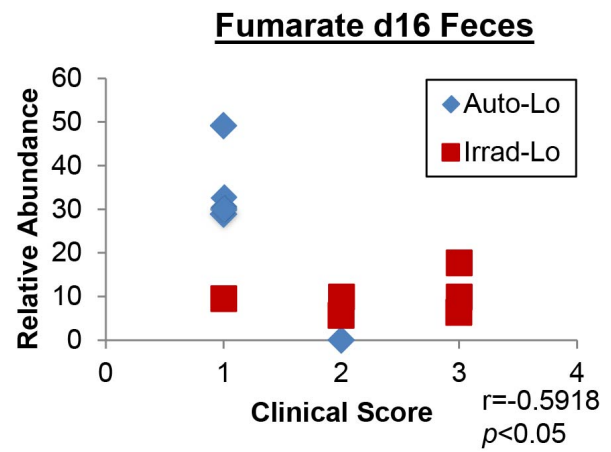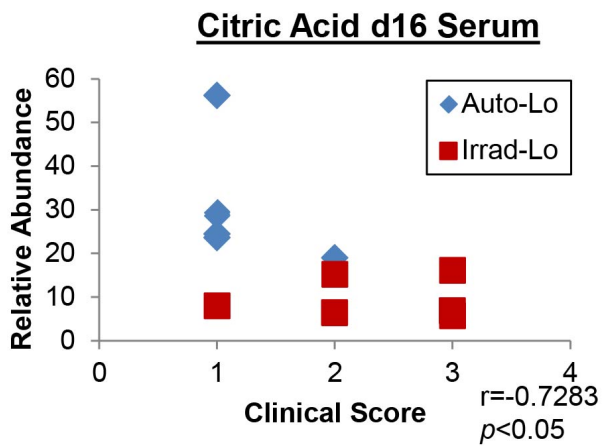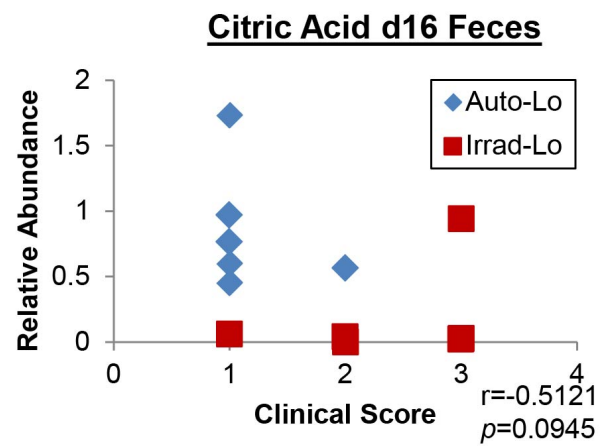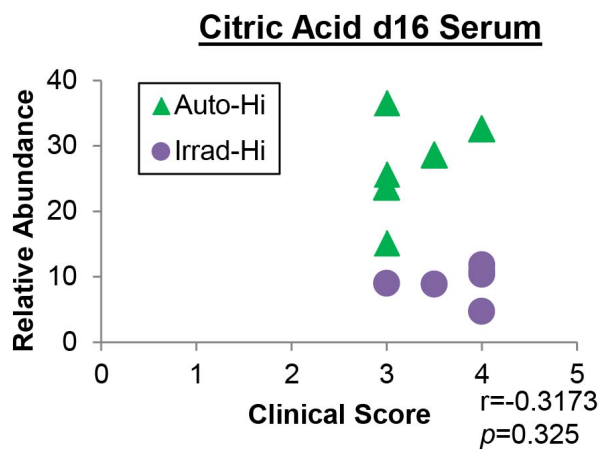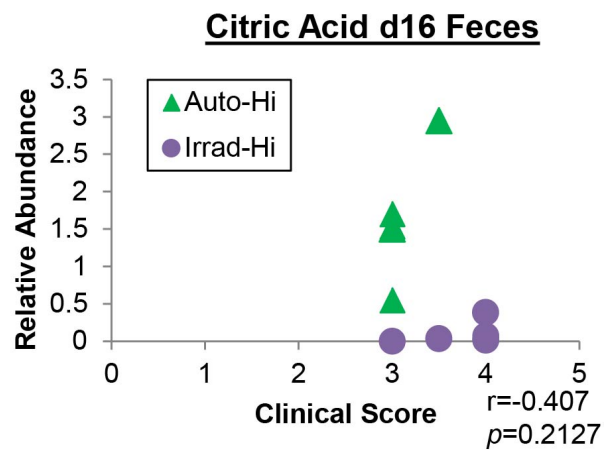

**Table S1. Grouped x-timept comparisons day -2 vs day 16 with mice with clinical score 0.**

| 1) Aut Zero, d-2 vs d16           |                               | 2) Zero, d-2 vs d16               |                               |
|-----------------------------------|-------------------------------|-----------------------------------|-------------------------------|
| Serum                             | Feces                         | Serum                             | Feces                         |
| 1-monostearyllycerol              | 1-monostearyllycerol          | 1-monostearyllycerol              | 1-monostearyllycerol          |
| 1-monopalmitoyllycerol            | 1-monopalmitoyllycerol        | 1-monopalmitoyllycerol            | 1-monopalmitoyllycerol        |
| 4-hydroxyproline                  | 4-hydroxyproline              | 4-hydroxyproline                  | 4-hydroxyproline              |
| homoserine                        | homoserine                    | homoserine                        | homoserine                    |
| isocitric acid                    | isocitric acid                | isocitric acid                    | L-pipecolic acidN             |
| succinic acid                     | succinic acid                 | succinic acid                     | chlorogenic acid              |
| 2-hydroxybutyric acid             | 2-hydroxybutyric acid         | 2-hydroxybutyric acid             | pantothenic acid              |
| hypoxanthine                      | hypoxanthine                  | 2-ketoglutaric acid               | hypoxanthine                  |
| xanthine                          | xanthine                      | uric acid                         | xanthine                      |
| tryptophan                        | tryptophan                    |                                   | 23:0 FA                       |
|                                   | uracil                        | uracil                            |                               |
| 1-monooleoyllycerol               | lauric acid                   | 1-monooleoyllycerol               | lauric acid                   |
| citric acid                       | un20.83_333.1338              | citric acid                       | un20.83_333.1338              |
| glucose-6-phosphate               | un20.83_333                   | glucose-6-phosphate               | un20.83_333                   |
| 3-hydroxyanthranilic acid         | un18.55_204.1001              | 3-hydroxyanthranilic acid         | un18.55_204.1001              |
| 2-DOG                             | B-hydroxybutyric acid         | 2-DOG                             | B-hydroxybutyric acid         |
| un30.06_83                        | GalNAc                        | un30.06_83                        | GalNAc                        |
| ribose(xyl)-5-phosphate           | GlcNAc                        | ribose(xyl)-5-phosphate           | GlcNAc                        |
| diphosphate                       | un14.96_133.0501              | diphosphate                       | un14.96_133.0501              |
| 3-(3-hydroxyphenyl)propanoic acid | 2-hydroxyphenylpropionic acid | 3-(3-hydroxyphenyl)propanoic acid | 2-hydroxyphenylpropionic acid |
| 1-phosphoglycerol                 | 5-aminovaleric acid           |                                   | 5-aminovaleric acid           |
| urea                              | un30.81_387                   |                                   | un30.81_387                   |
|                                   | AMP                           |                                   | AMP                           |
|                                   | deoxyinositol                 |                                   | deoxyinositol                 |
|                                   | palmitelaidic acid            |                                   | palmitelaidic acid            |
|                                   | B-alanine                     |                                   | B-alanine                     |
|                                   | glucose                       |                                   | glucose                       |
|                                   | 9H-purin-6-amine              |                                   | 9H-purin-6-amine              |
|                                   | un5.79_211.0033               |                                   | un5.79_211.0033               |
|                                   | un6.55_174.1128               |                                   | un6.55_174.1128               |
|                                   | D-erythro-2-pentulose         |                                   | D-erythro-2-pentulose         |
|                                   | gluconic acid                 |                                   | gluconic acid                 |
|                                   | ribose                        |                                   | ribose                        |
|                                   | arabinofuranose               |                                   | arabinofuranose               |
|                                   | ornithine                     |                                   | ornithine                     |
|                                   | 20:0 FA                       |                                   | 20:0 FA                       |
|                                   | N-methylalanine               |                                   | N-methylalanine               |
|                                   | arachidonic acid              |                                   |                               |
|                                   | dihydroxyquinone              |                                   |                               |
|                                   | un16.50_117.0729              |                                   |                               |
|                                   | un20.99_333.1338              |                                   |                               |
|                                   | 17:0 FA                       |                                   |                               |
|                                   | malic acid                    |                                   |                               |
|                                   | galacitol                     |                                   |                               |
|                                   | sorbitol                      |                                   |                               |
|                                   | 22:0 FA                       |                                   |                               |
|                                   | palmitic acid                 |                                   |                               |
|                                   | oleic acid                    |                                   |                               |
|                                   | phosphate                     |                                   |                               |
|                                   | glutamine                     |                                   |                               |
|                                   | fumaric acid                  |                                   |                               |
|                                   | orotateN                      |                                   |                               |
|                                   | m-hydroxyphenylpropionic acid |                                   |                               |
|                                   | erythrose                     |                                   |                               |

**Table S2. Grouped x-timept comparisons day -2 vs day 16 with mice having any disease (HiLo).**

| 1) Aut HiLo: d-2 vs d16   |                         | 2) Irr HiLo: d-2 vs d16      |                         | 3) HiLo: d-2 vs d16          |                         |
|---------------------------|-------------------------|------------------------------|-------------------------|------------------------------|-------------------------|
| Serum                     | Feces                   | Serum                        | Feces                   | Serum                        | Feces                   |
| uracil                    | uracil                  | uracil                       | uracil                  | uracil                       | uracil                  |
| homoserine                | homoserine              | homoserine                   | homoserine              | homoserine                   | homoserine              |
| 4-hydroxyproline          |                         | 4-hydroxyproline             | 4-hydroxyproline        | 4-hydroxyproline             | 4-hydroxyproline        |
|                           | arachidonic acid        | arachidonic acid             | arachidonic acid        | arachidonic acid             | arachidonic acid        |
| 2-hydroxybutyric acid     | 2-hydroxybutyric acid   | 2-hydroxybutyric acid        |                         | 2-hydroxybutyric acid        | 2-hydroxybutyric acid   |
| glucose-6-phosphate       | glucose-6-phosphate     | glucose-6-phosphate          |                         | glucose-6-phosphate          | glucose-6-phosphate     |
| sedoheptulose-7-P         | sedoheptulose-7-P       | sedoheptulose-7-P            |                         | sedoheptulose-7-P            | sedoheptulose-7-P       |
| succinic acid             | succinic acid           | succinic acid                |                         | succinic acid                | succinic acid           |
| isocitric acid            | isocitric acid          | isocitric acid               |                         | isocitric acid               |                         |
| 2-monostearyl glycerol    |                         | 2-monostearyl glycerol       | 2-monostearyl glycerol  | 2-monostearyl glycerol       |                         |
|                           |                         | pantothenic acid             | pantothenic acid        | pantothenic acid             | pantothenic acid        |
|                           |                         | B-alanine                    | B-alanine               | B-alanine                    |                         |
|                           |                         | aconitate                    | aconitate               | aconitate                    |                         |
| diphosphate               | GalNAc                  | diphosphate                  | GalNAc                  | diphosphate                  | GalNAc                  |
| uric acid                 | GlcNAc                  | uric acid                    | GlcNAc                  | uric acid                    | GlcNAc                  |
| 2-ketoglutaric acid       | 5-aminovaleric acid     | 2-ketoglutaric acid          | 5-aminovaleric acid     | 2-ketoglutaric acid          | 5-aminovaleric acid     |
| citric acid               | un30.81_387             | citric acid                  | un30.81_387             | citric acid                  | un30.81_387             |
| 3-hydroxyanthranilic acid | xanthine                | 3-hydroxyanthranilic acid    | xanthine                | 3-hydroxyanthranilic acid    | xanthine                |
| N-acetylglycine           | hypoxanthine            | N-acetylglycine              | hypoxanthine            | N-acetylglycine              | hypoxanthine            |
| 2-DOG                     | un16.50_117.0729        | 1-phosphoglycerol            | un16.50_117.0729        | 1-phosphoglycerol            | un16.50_117.0729        |
| urea                      | un5.79_211.0033         | fumaric acid                 | un5.79_211.0033         | fumaric acid                 | un5.79_211.0033         |
| linoleic acid             | AMP                     | un30.06_83                   | AMP                     | un30.06_83                   | AMP                     |
|                           | glucose                 | 3-(3-hydroxyphenyl)propanoic | glucose                 | 3-(3-hydroxyphenyl)propanoic | glucose                 |
|                           | 6-phosphogluconate      | inositol                     | 6-phosphogluconate      | 2-DOG                        | 6-phosphogluconate      |
|                           | phosphate               | malic acid                   | phosphate               | urea                         | phosphate               |
|                           | D-erythro-2-pentulose?  | nicotinamide                 | D-erythro-2-pentulose?  |                              | D-erythro-2-pentulose?  |
|                           | 22:0 FA                 | glutamic acid                | 22:0 FA                 |                              | 22:0 FA                 |
|                           | 1-monolinoleoylglycerol |                              | 1-monolinoleoylglycerol |                              | 1-monolinoleoylglycerol |
|                           | ribose                  |                              | ribose                  |                              | ribose                  |
|                           | mannose                 |                              | mannose                 |                              | mannose                 |
|                           | mannitol                |                              | mannitol                |                              | mannitol                |
|                           | 24:0 FA                 |                              | 24:0 FA                 |                              | 24:0 FA                 |
|                           | 24:1 FA                 |                              | 24:1 FA                 |                              | 24:1 FA                 |
|                           | fructose                |                              | fructose                |                              | fructose                |
|                           | chlorogenic acid        |                              | chlorogenic acid        |                              | chlorogenic acid        |
|                           | lysine                  |                              | lysine                  |                              | lysine                  |
|                           | leucine                 |                              | leucine                 |                              | leucine                 |
|                           | ornithine               |                              | ornithine               |                              | ornithine               |
|                           | alanine                 |                              | alanine                 |                              | alanine                 |
|                           | isoleucine              |                              | isoleucine              |                              | isoleucine              |
|                           | gluconic acid           |                              | gluconic acid           |                              | gluconic acid           |
|                           | N-methylalanine         |                              | N-methylalanine         |                              | N-methylalanine         |
|                           | un18.55_204.1001        |                              | un18.55_204.1001        |                              | un18.55_204.1001        |
|                           | un14.96_133.0501        |                              | un14.96_133.0501        |                              | un14.96_133.0501        |
|                           | un6.55_174.1128         |                              | L-pipecolic acidN       |                              | L-pipecolic acidN       |
|                           | un20.83_333             |                              | Indolecarboxylic acid?  |                              | Indolecarboxylic acid?  |
|                           | un20.83_333.1338        |                              | methionine              |                              | methionine              |
|                           | 9H-purin-6-amine?       |                              | glycerol                |                              | glycerol                |
|                           | arabinofuranose         |                              | aspartic acid           |                              | aspartic acid           |
|                           | palmitelaidic acid      |                              | N-acetylaspartate       |                              | N-acetylaspartate       |
|                           | 3-hydroxybutyrate       |                              | threonine               |                              | threonine               |
|                           | B-hydroxybutyric acid   |                              | 19:0 FA                 |                              | 19:0 FA                 |
|                           | un20.99_333.1338        |                              | thymine                 |                              | thymine                 |
|                           | N-acetylglutamate       |                              | valine                  |                              | valine                  |
|                           | un30.94_387.1141        |                              | sarcosine               |                              | sarcosine               |

ergosterol  
lauric acid  
pyridine-2-6-dicarboxylic acid  
orotateN  
1-monostearyl glycerol  
rhamnose  
1-monopalmitoyl glycerol  
2,3-pyridinedicarboxylic acid  
Trans-cinnamic acid  
Xylose or isomer  
Fructose-6-phosphate  
2-phosphoglycerol  
Dihydroxyquinone  
un12.13\_263  
p-hydroxyphenylacetic acid  
deoxy-inositol?  
un13.58\_204.1001  
5-hydroxyindoleacetic acid  
aminopimelic acid  
2-hydroxyphenylpropionic acid  
3-phosphoglycerate  
galactitol  
sorbitol  
2-aminoadipic acid  
5-aminopentanoic acid  
3-indoleacetic acid  
glutamic acid  
B-sitosterol

un13.58\_204.1001  
inositol  
malic acid  
histidine  
1-monooleoyl glycerol  
Ribulose(xylulose)-5-P  
Erythrose-4-phosphate  
Mevalonic acid

un6.55\_174.1128  
un20.83\_333  
un20.83\_333.1338  
9H-purin-6-amine?  
arabinofuranose  
palmitelaidic acid  
3-hydroxybutyrate  
B-hydroxybutyric acid  
un20.99\_333.1338  
N-acetylglutamate  
un30.94\_387.1141  
ergosterol  
lauric acid  
pyridine-2-6-  
dicarboxylic acid  
orotateN  
1-monostearyl glycerol  
rhamnose  
1-monopalmitoyl glycerol  
2,3-pyridinedicarboxylic acid  
Trans-cinnamic acid  
Xylose or isomer  
Fructose-6-phosphate  
2-phosphoglycerol  
Dihydroxyquinone  
un12.13\_263  
p-hydroxyphenylacetic acid  
deoxy-inositol?  
tyrosine

**Table S3. Grouped x-timept comparisons day -2 vs day 16 for different clinical score groups.**

| 1) Hi: d-2 vs d16                  |                               | 2) HiLo: d-2 vs d16                |                             | 3) Lo: d-2 vs d16                  |                                    | 4) Zero: d-2 vs d16                |                               |
|------------------------------------|-------------------------------|------------------------------------|-----------------------------|------------------------------------|------------------------------------|------------------------------------|-------------------------------|
| Serum                              | Feces                         | Serum                              | Feces                       | Serum                              | Feces                              | Serum                              | Feces                         |
| homoserine                         | homoserine                    | homoserine                         | homoserine                  | homoserine                         | homoserine                         | homoserine                         | homoserine                    |
| uracil                             | uracil                        | uracil                             | uracil                      | uracil                             | uracil                             | uracil                             |                               |
| 2-hydroxybutyric a                 | 2-hydroxybutyric a            | 2-hydroxybutyric a                 | 2-hydroxybutyric a          | 2-hydroxybutyric a                 | 2-hydroxybutyric a                 | 2-hydroxybutyric a                 |                               |
| 4-hydroxyproline                   | 4-hydroxyproline              | 4-hydroxyproline                   | 4-hydroxyproline            | 4-hydroxyproline                   |                                    | 4-hydroxyproline                   | 4-hydroxyproline              |
| glucose-6-phosphate                | glucose-6-phosphate           | glucose-6-phosphate                | glucose-6-phosphate         | glucose-6-phosphate                |                                    | glucose-6-phosphate                |                               |
| pantothenic acid                   | pantothenic acid              | pantothenic acid                   | pantothenic acid            | pantothenic acid                   |                                    |                                    | pantothenic acid              |
|                                    | 1-monostearylglycerol         |                                    | 1-monostearylglycerol       | 1-monostearylglycerol              | 1-monostearylglycerol              | 1-monostearylglycerol              | 1-monostearylglycerol         |
|                                    |                               |                                    | 1-monopalmitoylglycerol     | 1-monopalmitoylglycerol            | 1-monopalmitoylglycerol            | 1-monopalmitoylglycerol            | 1-monopalmitoylglycerol       |
| sedoheptulose-7-P                  | sedoheptulose-7-P             | sedoheptulose-7-P                  | sedoheptulose-7-P           | sedoheptulose-7-P                  | 23:0 FA                            |                                    | 23:0 FA                       |
| ribose(xyl)-5-P                    | arachidonic acid              | arachidonic acid                   | arachidonic acid            | arachidonic acid                   | arachidonic acid                   | ribose(xyl)-5-P                    |                               |
| B-alanine                          | B-alanine                     | B-alanine                          |                             | B-alanine                          |                                    |                                    | B-alanine                     |
| succinic acid                      |                               | succinic acid                      | succinic acid               | succinic acid                      |                                    | succinic acid                      |                               |
| 3-(3-hydroxyphenyl) propanoic acid | 2-hydroxyphenylpropionic acid | 3-(3-hydroxyphenyl) propanoic acid | deoxy-inositol?             | 3-(3-hydroxyphenyl) propanoic acid | 3-(3-hydroxyphenyl) propanoic acid | 3-(3-hydroxyphenyl) propanoic acid | 2-hydroxyphenylpropionic acid |
| 3-hydroxyanthranilic a             | GalNAc                        | 3-hydroxyanthranilic a             | GalNAc                      | 3-hydroxyanthranilic a             | GalNAc                             | 3-hydroxyanthranilic a             | GalNAc                        |
| 2-DOG                              | GlcNAc                        | 2-DOG                              | GlcNAc                      | 2-DOG                              | GlcNAc                             | 2-DOG                              | GlcNAc                        |
| un30.06_83                         | 5-aminovaleric acid           | un30.06_83                         | 5-aminovaleric acid         | un30.06_83                         | 5-aminovaleric acid                | un30.06_83                         | 5-aminovaleric acid           |
| diphosphate                        | xanthine                      | diphosphate                        | xanthine                    | diphosphate                        | xanthine                           | diphosphate                        | xanthine                      |
| 2-ketoglutaric acid                | un20.83_333.1338              | 2-ketoglutaric acid                | un20.83_333.1338            | 2-ketoglutaric acid                | un20.83_333.1338                   | 2-ketoglutaric acid                | un20.83_333.1338              |
| uric acid                          | un20.83_333                   | uric acid                          | un20.83_333                 | uric acid                          | un20.83_333                        | uric acid                          | un20.83_333                   |
| isocitric acid                     | un14.96_133.0501              | isocitric acid                     | un14.96_133.0501            | isocitric acid                     | un14.96_133.0501                   | isocitric acid                     | un14.96_133.0501              |
| citric acid                        | un30.81_387                   | citric acid                        | un30.81_387                 | citric acid                        | un30.81_387                        | citric acid                        | un30.81_387                   |
| N-acetylglycine                    | AMP                           | N-acetylglycine                    | AMP                         | N-acetylglycine                    | AMP                                | 1-monooleoylglycerol               | AMP                           |
| 1-phosphoglycerol                  | L-pipecolic acidN             | 1-phosphoglycerol                  | L-pipecolic acidN           | 1-phosphoglycerol                  | L-pipecolic acidN                  |                                    | L-pipecolic acidN             |
| fumaric acid                       | palmitelaidic acid            | fumaric acid                       | palmitelaidic acid          | fumaric acid                       | palmitelaidic acid                 |                                    | palmitelaidic acid            |
| urea                               | glucose                       | urea                               | glucose                     | urea                               | glucose                            |                                    | glucose                       |
| 2-monostearylglycerol              | 9H-purin-6-amine              | 2-monostearylglycerol              | 9H-purin-6-amine            | 2-monostearylglycerol              | 9H-purin-6-amine                   |                                    | 9H-purin-6-amine              |
| linoleic acid                      | un18.55_204.1001              | aconitinate                        | un18.55_204.1001            | homocysteine                       | un18.55_204.1001                   |                                    | un18.55_204.1001              |
|                                    | N-methylalanine               |                                    | N-methylalanine             |                                    | N-methylalanine                    |                                    | N-methylalanine               |
|                                    | gluconic acid                 |                                    | gluconic acid               |                                    | gluconic acid                      |                                    | gluconic acid                 |
|                                    | ribose                        |                                    | ribose                      |                                    | ribose                             |                                    | ribose                        |
|                                    | hypoxanthine                  |                                    | hypoxanthine                |                                    | hypoxanthine                       |                                    | hypoxanthine                  |
|                                    | D-erythro-2-pentulose         |                                    | D-erythro-2-pentulose       |                                    | D-erythro-2-pentulose              |                                    | D-erythro-2-pentulose         |
|                                    | un5.79_211.0033               |                                    | un5.79_211.0033             |                                    | un5.79_211.0033                    |                                    | un5.79_211.0033               |
|                                    | arabinofuranose               |                                    | arabinofuranose             |                                    | arabinofuranose                    |                                    | arabinofuranose               |
|                                    | ornithine                     |                                    | ornithine                   |                                    | ornithine                          |                                    | ornithine                     |
|                                    | un6.55_174.1128               |                                    | un6.55_174.1128             |                                    | un6.55_174.1128                    |                                    | un6.55_174.1128               |
|                                    | lauric acid                   |                                    | lauric acid                 |                                    | lauric acid                        |                                    | lauric acid                   |
|                                    | 1-monooleoylglycerol          |                                    | chlorogenic acid            |                                    | chlorogenic acid                   |                                    | chlorogenic acid              |
|                                    | B-hydroxybutyric acid         |                                    | B-hydroxybutyric acid       |                                    |                                    |                                    | B-hydroxybutyric acid         |
|                                    | 6-phosphogluconate            |                                    | 6-phosphogluconate          |                                    | 6-phosphogluconate                 |                                    | 6-phosphogluconate            |
|                                    | pyridine-2-6-dicarboxylic a   |                                    | pyridine-2-6-dicarboxylic a |                                    | pyridine-2-6-dicarboxylic a        |                                    | pyridine-2-6-dicarboxylic a   |
|                                    | 24:0 FA                       |                                    | 24:0 FA                     |                                    | 24:0 FA                            |                                    | 24:0 FA                       |
|                                    | 24:1 FA                       |                                    | 24:1 FA                     |                                    | 24:1 FA                            |                                    | 24:1 FA                       |
|                                    | fructose                      |                                    | fructose                    |                                    | fructose                           |                                    | fructose                      |
|                                    | mannose                       |                                    | mannose                     |                                    | mannose                            |                                    | mannose                       |
|                                    | mannitol                      |                                    | mannitol                    |                                    | mannitol                           |                                    | mannitol                      |
|                                    | 22:0 FA                       |                                    | 22:0 FA                     |                                    | 22:0 FA                            |                                    | 22:0 FA                       |
|                                    | alanine                       |                                    | alanine                     |                                    | alanine                            |                                    | alanine                       |
|                                    | orotateN                      |                                    | orotateN                    |                                    | orotateN                           |                                    | orotateN                      |
|                                    | N-acetylglutamate             |                                    | N-acetylglutamate           |                                    | N-acetylglutamate                  |                                    | N-acetylglutamate             |
|                                    | rhamnose                      |                                    | rhamnose                    |                                    | rhamnose                           |                                    | rhamnose                      |
|                                    | ergosterol                    |                                    | ergosterol                  |                                    | ergosterol                         |                                    | ergosterol                    |
|                                    | sarcosine                     |                                    | sarcosine                   |                                    | sarcosine                          |                                    | sarcosine                     |
|                                    | 1-monolinoleoylglycerol       |                                    | 1-monolinoleoylglycerol     |                                    | 5-aminopentanoic acid              |                                    | 1-monolinoleoylglycerol       |
|                                    | un16.50_117.0729              |                                    | un16.50_117.0729            |                                    | histidine                          |                                    | un16.50_117.0729              |
|                                    | 3-hydroxybutyrate             |                                    | 3-hydroxybutyrate           |                                    | serine                             |                                    | 3-hydroxybutyrate             |
|                                    | N-acetylaspartate             |                                    | N-acetylaspartate           |                                    | 2-aminoadipic acid                 |                                    | N-acetylaspartate             |
|                                    | phosphate                     |                                    | phosphate                   |                                    | galactitol                         |                                    | phosphate                     |

un20.99\_333.1338  
un30.94\_387.1141  
thymine  
Dihydroxyquinone  
trans-cinnamic acid  
indolecarboxylic acid?  
un12.13\_263  
2,3-pyridinedicarboxylic a  
fructose-6-phosphate  
Mevalonic acid  
glyceric acid

un20.99\_333.1338  
un30.94\_387.1141  
thymine  
Dihydroxyquinone  
trans-cinnamic acid  
indolecarboxylic acid?  
un12.13\_263  
2,3-pyridinedicarboxylic a  
fructose-6-phosphate  
leucine  
isoleucine  
methionine  
glycerol  
lysine  
aspartic acid  
threonine  
19:0 FA  
valine  
Xylose or isomer  
2-phosphoglycerol  
p-hydroxyphenylacetic a  
tyrosine

aminomalonic acid  
ribulose(xylulose)-5-P  
erythrose-4-phosphate  
sorbitol  
3-phosphoglycerate

leucine  
isoleucine  
methionine  
glycerol  
lysine  
aspartic acid  
threonine  
19:0 FA  
valine  
Xylose or isomer  
2-phosphoglycerol  
p-hydroxyphenylacetic a  
tyrosine

---
